# Supplementary material for: Tunneling transport of 2D anisotropic XC (X = P, As, Sb, Bi) with a direct band gap and high mobility: a DFT coupled with NEGF study
Source: Royal Society of Chemistry journal article supplement (doi:10.1039/d2nr03578b), 2022-01-01
Supplement: d2nr03578b1.pdf [file d2nr03578b1.pdf]

## Supporting Information

### **Tunneling transport of 2D anisotropic XC (X = P, As, Sb, Bi) with direct band gap and high mobility: A DFT coupled with NEGF study**

Xuemin Hu<sup>1</sup>, Wenqiang Liu<sup>2</sup>, Jialin Yang<sup>2</sup>, Wei Wang<sup>1</sup>, Luanhong Sun<sup>1</sup>, Xiaoqin Shi\*<sup>2</sup>, Yufeng Hao<sup>3</sup>, Shengli Zhang<sup>2</sup>, Wenhan Zhou\*<sup>2</sup>

<sup>1</sup> School of Material Engineering, Jinling Institute of Technology, Nanjing 211169, China

<sup>2</sup> Key Laboratory of Advanced Display Materials and Devices, Ministry of Industry and Information Technology, College of Material Science and Engineering, Nanjing University of Science and Technology, Nanjing 210094, China

<sup>3</sup> National Laboratory of Solid State Microstructures, College of Engineering and Applied Sciences, Collaborative Innovation Center of Advanced Microstructures, and Jiangsu Key Laboratory of Artificial Functional Materials, Nanjing University, Nanjing 210093, China.

\* E-mail: [sxq@njust.edu.cn](mailto:sxq@njust.edu.cn); [zhouwenhan@njust.edu.cn](mailto:zhouwenhan@njust.edu.cn)

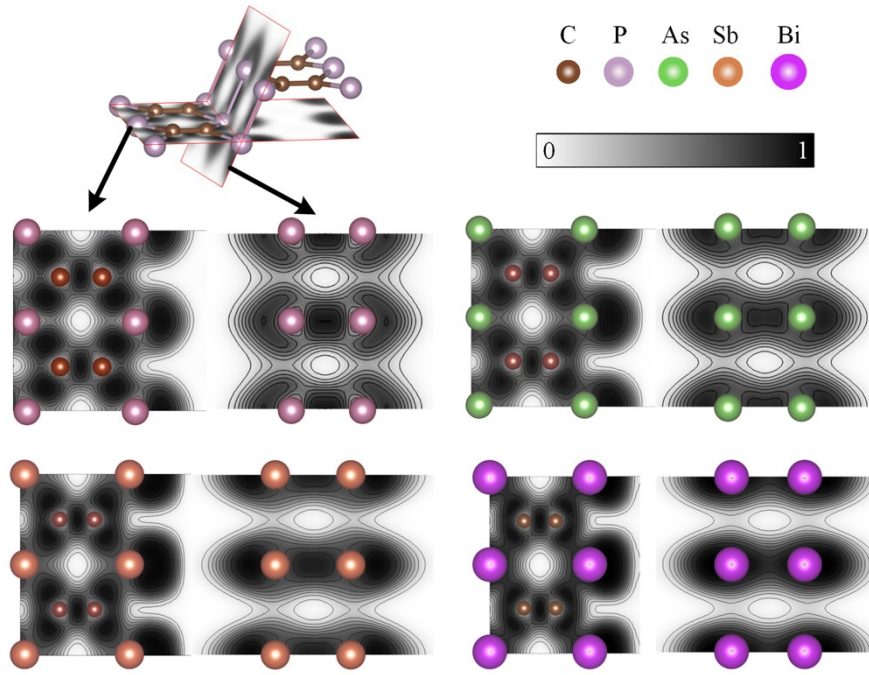

Figure S1. Electron localization function of the  $\alpha$ -XC (X = P, As, Sb, Bi) monolayers.

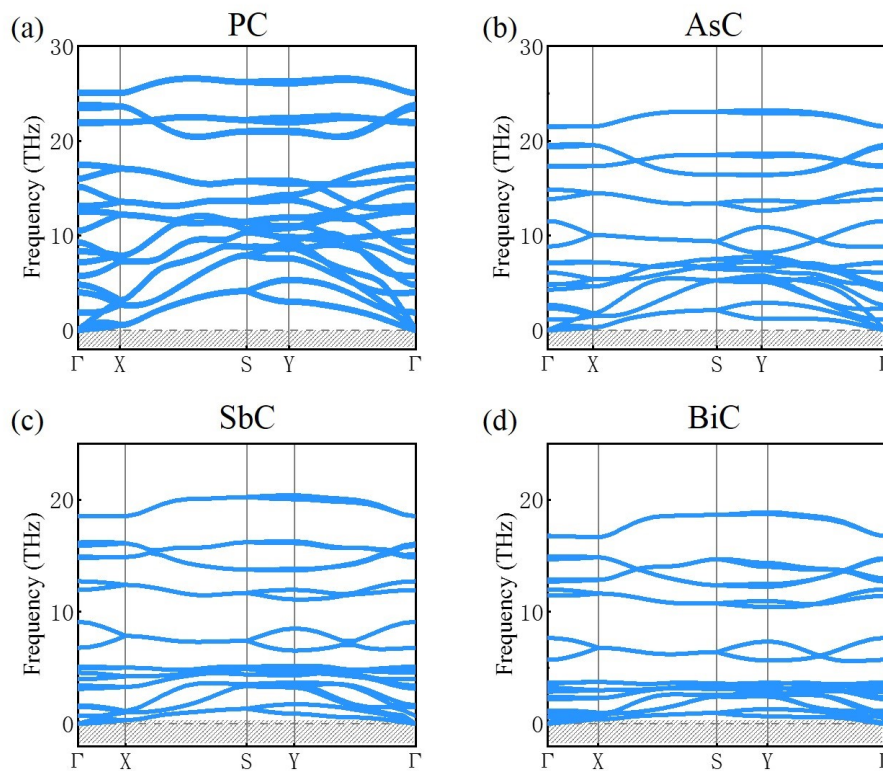

Figure S2. Phonon band dispersions of the (a) PC, (b) AsC, (c) SbC and (d) BiC monolayers, respectively.

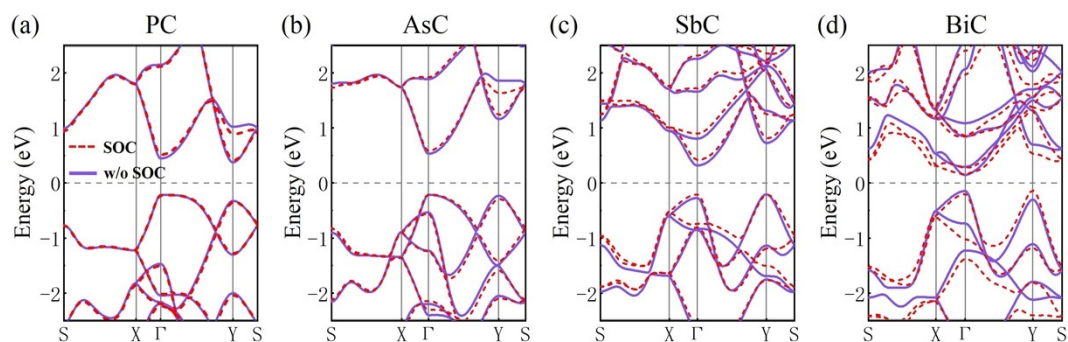

Figure S3. Band structures of (a) PC, (b) AsC, (c) SbC and (d) BiC with and without SOC, respectively.

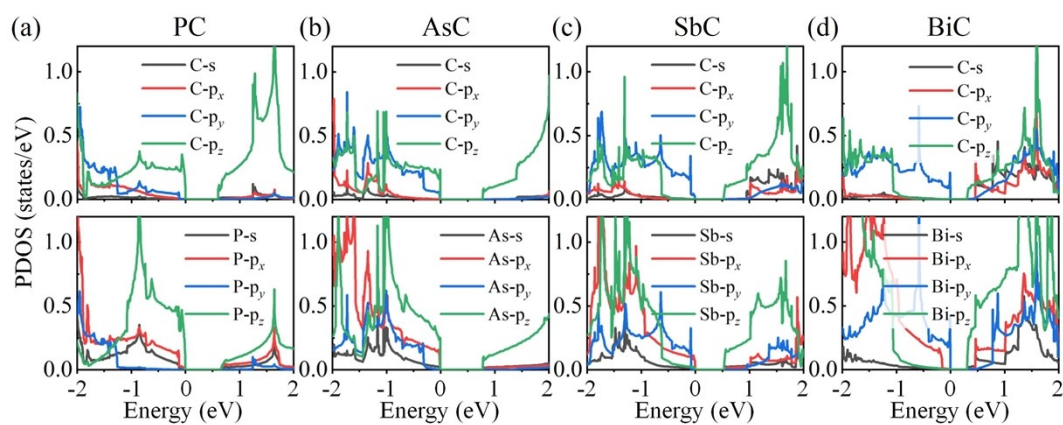

Figure S4. Projected density of states of (a) PC, (b) AsC, (c) SbC and (d) BiC monolayers, respectively.

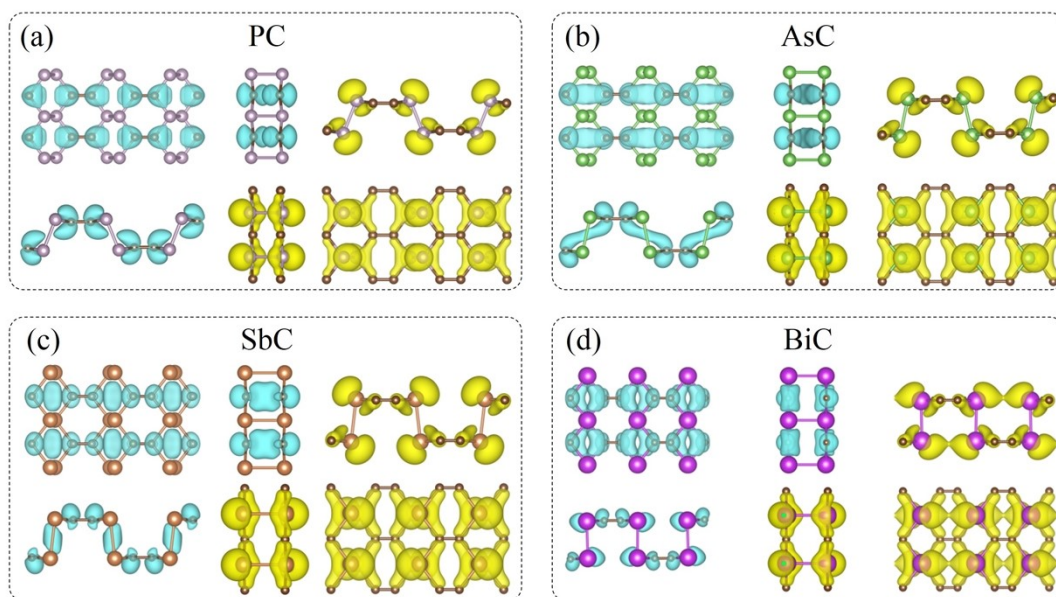

Figure S5. Iso-surfaces of partial charge densities for the VBM (yellow) and CBM (cyan) of (a) PC, (b) AsC, (c) SbC and (d) BiC monolayers, respectively.
